# Supplementary material for: Phenotypic and Genetic Spectrum of Autosomal Recessive Bestrophinopathy and Best Vitelliform Macular Dystrophy
Source: PubMed Central journal article supplement — Invest Ophthalmol Vis Sci. 2021 May 20;62(6):22. doi: 10.1167/iovs.62.6.22 (PMC8142704; doi:10.1167/iovs.62.6.22), 2021-05-20
Supplement: iovs-62-6-22_s001.pdf [file iovs-62-6-22_s001.pdf]

| Mutation | Inheritance | Phenotype   | Citation                |
|----------|-------------|-------------|-------------------------|
| Thr2Ala  | AD          | VMD         | [1, 2]                  |
| Thr2Ile  | AD          | VMD         | [2]                     |
| Thr2Asn  | AD          | VMD         | [2, 3]                  |
| Thr2Ser  | AD          | VMD         | [4]                     |
| Ile3Asn  | AD          | VMD         | [5]                     |
| Ile3Thr  | AD          | VMD         | [6]                     |
| Thr4Ala  | AD          | VMD         | [2, 7]                  |
| Thr4Ile  | AD          | VMD         | [2, 8]                  |
| Tyr5His  | AD          | VMD         | [2]                     |
| Tyr5X    | AR          | VMD         | [9]                     |
| Thr6Ala  | AD          | VMD         | [2, 10]                 |
| Thr6Ile  | AD          | VMD         | [11]                    |
| Thr6Lys  | AD          | VMD         | [2]                     |
| Thr6Pro  | AD          | VMD         | [2, 12-15]              |
| Thr6Arg  | AD          | VMD         | [2, 16, 17]             |
| Ser7Asn  | AD          | VMD         | [1, 17]                 |
| Val9Ala  | AD          | VMD         | [2, 12, 14, 15, 18, 19] |
| Val9Leu  | AD          | VMD         | [2, 20]                 |
| Val9Met  | AD          | VMD         | [2, 11, 15, 21, 22]     |
| Ala10Thr | AD          | VMD         | [2, 15, 22-24]          |
| Ala10Val | AD          | VMD         | [12, 15]                |
| Asn11Ile | AD          | VMD         | [2, 25]                 |
| Arg13Cys | AD          | VMD         | [2, 11]                 |
| Arg13His | AR          | VMD and ARB | [8, 17, 26, 27]         |
| Arg13His | AD          | VMD         | [2, 15, 28, 29]         |
| Arg13Pro | AD          | VMD         | [2]                     |
| Gly15Asp | AD          | VMD         | [2, 18]                 |
| Gly15Arg | AD          | VMD         | [30]                    |
| Ser16Phe | AD          | VMD         | [2, 17, 23, 31-33]      |
| Ser16Tyr | AD          | VMD         | [2, 13]                 |
| Phe17Cys | AD          | VMD         | [2, 16, 33]             |
| Phe17Ser | AD          | VMD         | [2]                     |
| Arg19Leu | AD          | VMD         | [2]                     |
| Leu20Val | AD          | VMD         | [4, 34]                 |
| Leu21Arg | AD          | VMD         | [11]                    |
| Leu21Val | AD          | VMD         | [2, 15]                 |
| Trp24Cys | AD          | VMD         | [15, 16, 23, 24]        |
| Arg25Asn | AD          | VMD         | [2]                     |
| Arg25Gln | AR          | ARB         | [35]                    |
| Arg25Gln | AD          | VMD         | [15, 24]                |

|          |    |     |                                |
|----------|----|-----|--------------------------------|
| Arg25Trp | AR | ARB | [17, 36]                       |
| Arg25Trp | AD | VMD | [1, 2, 15, 16, 18, 22, 37, 38] |
| Gly26Arg | AD | VMD | [2, 25]                        |
| Ser27Arg | AD | VMD | [2, 15, 22]                    |
| Tyr29Cys | AD | VMD | [2, 39]                        |
| Tyr29His | AD | VMD | [2, 25]                        |
| Tyr29X   | AR | VMD | [2, 19]                        |
| Lys30Glu | AD | VMD | [26]                           |
| Lys30Asn | AD | VMD | [2]                            |
| Lys30Arg | AD | VMD | [2, 16, 40, 41]                |
| Tyr33His | AR | VMD | [8]                            |
| Gly34Gly | AR | ARB | [29, 36, 41, 42]               |
| Glu35Lys | AR | ARB | [17, 41]                       |
| Ile38er  | AD | VMD | [43]                           |
| Leu40Pro | AR | ARB | [17, 44]                       |
| Leu41Pro | AR | ARB | [45, 46]                       |
| Leu41Pro | AD | VMD | [2, 25]                        |
| Tyr44His | AR | ARB | [17]                           |
| Arg47Cys | AR | VMD | [2, 38]                        |
| Arg47His | AR | ARB | [17, 29, 47]                   |
| Arg47His | AD | VMD | [2, 32]                        |
| Leu52Pro | AR | ARB | [29]                           |
| Gln58Leu | AD | VMD | [2, 15, 22]                    |
| Gln58X   | AR | ARB | [26, 48]                       |
| Gln59X   | AR | ARB | [35]                           |
| Tyr72Asp | AD | VMD | [2]                            |
| Ile73Phe | AD | VMD | [20]                           |
| Ile73Met | AD | VMD | [17]                           |
| Ile73Asn | AD | VMD | [2, 33]                        |
| Ile73Val | AD | VMD | [2, 14]                        |
| Gln74X   | AR | ARB | [17]                           |
| Leu75Phe | AD | VMD | [3]                            |
| Leu75Pro | AD | VMD | [2, 4]                         |
| Ile76Met | AD | VMD | [17]                           |
| Ile76Asn | AD | VMD | [2]                            |
| Ile76Thr | AD | VMD | [17]                           |
| Ile76Val | AD | VMD | [2, 21]                        |
| Ser79Tyr | AR | VMD | [4]                            |
| Phe80Cys | AD | VMD | [38]                           |
| Phe80Leu | AD | VMD | [1, 2, 16, 23]                 |
| Phe80Val | AD | VMD | [20]                           |
| Val81Met | AD | VMD | [1, 2, 17, 21]                 |
| Val81Leu | AR | VMD | [4]                            |

|           |           |     |                             |
|-----------|-----------|-----|-----------------------------|
| Leu82Val  | AD        | VMD | [2, 6, 12, 15, 19, 34]      |
| Gly83Leu  | AD        | VMD | [23]                        |
| Phe84Val  | AD        | VMD | [2, 23]                     |
| Tyr85His  | AD        | VMD | [2, 12, 14, 15, 19, 20, 34] |
| Val86Met  | AD        | VMD | [2]                         |
| Leu88X    | AR        | ARB | [49]                        |
| Val89Ala  | AD        | VMD | [2, 19, 50]                 |
| Thr91Ile  | AD        | VMD | [2, 16, 18, 47]             |
| Arg92Cys  | AD and AR | VMD | [2, 12, 15, 18, 29]         |
| Arg92Gly  | AD        | VMD | [2, 18]                     |
| Arg92His  | AD        | VMD | [2, 19, 33, 34, 51]         |
| ARg92Ser  | AD        | VMD | [2, 15, 22]                 |
| Trp93Cys  | AD        | VMD | [2, 12, 14, 15, 23, 28, 52] |
| Trp93Pro  | AR        | ARB | [53]                        |
| Trp93Arg  | AD        | VMD | [2, 23]                     |
| Trp93Ser  | AD        | VMD | [17]                        |
| Trp94Leu  | AD        | VMD | [17]                        |
| Gln96Glu  | AD        | VMD | [2, 41]                     |
| Gln94His  | AD        | VMD | [2, 12, 15]                 |
| Gln96Arg  | AD        | VMD | [2, 34, 54, 55]             |
| Trp97His  | AD        | VMD | [17]                        |
| Glu98Lys  | AD        | VMD | [56]                        |
| Asn99Asp  | AR        | ARB | [17]                        |
| Asn99His  | AD        | VMD | [34]                        |
| Asn99Lys  | AD        | VMD | [2, 15, 22, 57]             |
| Asn99Tyr  | AD        | VMD | [2, 21]                     |
| Leu100Arg | AD        | VMD | [2, 11, 15, 22, 25]         |
| Pro101Leu | AR        | ARB | [58]                        |
| Pro101Leu | AD        | VMD | [2, 41]                     |
| Pro101Thr | AR        | ARB | [2, 59]                     |
| Pro101Thr | AD        | VMD | [16, 20]                    |
| Trp102Arg | AD        | VMD | [2, 25]                     |
| Asp104Glu | AD        | VMD | [2, 12, 14, 15, 19]         |
| Asp104His | AD        | VMD | [2, 25]                     |
| Arg105Gly | AD        | VMD | [17, 30]                    |
| Leu109Tyr | AR        | ARB | [17]                        |
| Phe113Leu | AD        | VMD | [2]                         |
| Glu115X   | AD        | VMD | [4]                         |
| Asp118Ala | AR        | ARB | This Study                  |
| Glu119Gln | AD        | VMD | [20]                        |
| Leu123X   | AR        | ARB | [17]                        |

|            |           |             |                                                                                         |
|------------|-----------|-------------|-----------------------------------------------------------------------------------------|
| Thr124Met  | AR        | ARB         | [26]                                                                                    |
| Thr127Mer  | AR        | ARB         | [26]                                                                                    |
| Arg130Leu  | AR        | ARb         | [8, 27]                                                                                 |
| Arg130Ser  | AD and AR | VMD         | [20, 60]                                                                                |
| Tyr131Cys  | AR        | ARB         | [47]                                                                                    |
| Asn133Asp  | AR        | ARB         | [26]                                                                                    |
| Asn133Lys  | AD        | VMD         | [2, 16, 41, 61]                                                                         |
| Leu134Val  | AR        | ARB         | [62]                                                                                    |
| Leu134Val  | AD        | VMD         | [2, 63]                                                                                 |
| Gly135Ser  | AD        | VMD         | [12, 15, 16, 21]                                                                        |
| Leu140Val  | AR        | ARB, RP     | This study, [64]                                                                        |
| Leu140Arg  | AD        | VMD         | [2, 16]                                                                                 |
| Arg141His  | AR        | VMD and ARB | [2, 11, 19, 35, 45, 48, 53, 58, 65-68]                                                  |
| Arg141His  | AD        | VMD         | [15]                                                                                    |
| Arg141Ser  | AR        | VMD         | [2, 67]                                                                                 |
| Ser142Gly  | AD        | VMD         | [29]                                                                                    |
| Val143Ala  | AD        | VMD         | [11]                                                                                    |
| Val143Phe  | AD        | VMD         | [2, 29]                                                                                 |
| Ser144Gly  | AD and AR | VMD         | [9]                                                                                     |
| Ser144Asn  | AD        | VMD         | [2, 32]                                                                                 |
| Ala146Lys  | AD        | VMD         | [2, 69]                                                                                 |
| Ala146Ser  | AD        | VMD         | [70]                                                                                    |
| Ala146Thr  | AR        | ARB         | [29]                                                                                    |
| Pro148Ser  | AR        | ARB         | [48]                                                                                    |
| Arg150Pro  | AR        | ARB         | [47]                                                                                    |
| Pro152Ala  | AR        | VMD and ARB | [2, 45]                                                                                 |
| Ser157X    | AD        | VMD         | Luo <i>et al.</i> Novel Best1 Mutations in chinese patients. <i>Arvo Abstract. 2017</i> |
| Gln159X    | AR        | ARB         | [48]                                                                                    |
| Ala160Pro  | AR        | ARB         | [36]                                                                                    |
| Met163Arg  | AR        | ARB         | [8, 17, 29]                                                                             |
| Glu167Gly  | AR        | ARB         | [26, 71]                                                                                |
| Tyr167Cys* | AD        | VMD         | [71]                                                                                    |
| Lys173X    | AR        | VMD         | [8]                                                                                     |
| Leu174X    | AR        | ARB         | [72]                                                                                    |
| His178X    | AD        | VMD         | [2, 21]                                                                                 |
| Asn179X    | AR        | VMD         | [20, 38]                                                                                |
| Phe188Ser  | AR        | ARB         | [62]                                                                                    |
| Leu191Pro  | AR        | ARB         | [53]                                                                                    |
| Leu191Pro  | AD        | VMD         | [2, 39]                                                                                 |
| Lys194X    | AD        | VMD         | [2, 13]                                                                                 |

|           |           |             |                                                         |
|-----------|-----------|-------------|---------------------------------------------------------|
| Ala195Val | AR        | VMD and ARB | [2, 8, 11, 17, 26]                                      |
| Ala195Val | AD        | VMD         | [1, 2, 13, 16, 25]                                      |
| Arg200X   | AR        | ARB         | [26, 45, 73]                                            |
| Ile201Thr | AD and AR | VMD         | [2, 16, 21]                                             |
| Ile201X   | AR        | VMD         | [2]                                                     |
| Arg202Trp | AR        | ARB         | [74]                                                    |
| Ile205Tyr | AD        | ARB         | [75]                                                    |
| Ile205X   | AR        | VMD         | [2]                                                     |
| Leu207Ile | AD        | VMD         | [16]                                                    |
| Ser209Asn | AD        | VMD         | [2, 15, 22]                                             |
| Ile211Thr | AD        | VMD         | [16]                                                    |
| Glu213Lys | AD        | VMD         | [2]                                                     |
| Glu213Lys | AR        | ARB         | [76]                                                    |
| Val216Ile | AR        | ARB         | [47]                                                    |
| Leu217Phe | AD        | VMD         | [2, 39]                                                 |
| Arg218Cys | AR        | ARB         | [26]                                                    |
| Arg218Cys | AD        | VMD         | [2, 3, 4, 8, 11, 12, 15-17, 23, 28, 33, 38, 54, 57, 77] |
| Arg218His | AR        | ARB         | [78]                                                    |
| Arg218Gly | AD        | VMD         | [2, 38]                                                 |
| Arg218His | AD        | VMD         | [1, 2, 16, 20, 21, 23, 29, 33, 40, 41, 63]              |
| Arg218Asn | AD        | VMD         | [2]                                                     |
| Arg218Gln | AD        | VMD         | [23]                                                    |
| Arg218Ser | AD        | VMD         | [2, 12, 15, 22, 70]                                     |
| Gln220Pro | AD        | VMD         | [2]                                                     |
| Gln220X   | AR        | ARB         | [79]                                                    |

**Supplemental Table 1.** List of ARB and VMD mutations and accompanying inheritance patterns for BEST1 residues 1-220. \*may be incorrect, but is recorded as listed in article.

1. Katagiri, S., et al., *Mutation analysis of BEST1 in Japanese patients with Best's vitelliform macular dystrophy*. Br J Ophthalmol, 2015. **99**(11): p. 1577-82.
2. Kinnick, T.R., et al., *Autosomal recessive vitelliform macular dystrophy in a large cohort of vitelliform macular dystrophy patients*. Retina, 2011. **31**(3): p. 581-95.
3. Wong, R.L., et al., *Novel and homozygous BEST1 mutations in Chinese patients with Best vitelliform macular dystrophy*. Retina, 2010. **30**(5): p. 820-7.
4. Guo, J., et al., *NOVEL BEST1 MUTATIONS DETECTED BY NEXT-GENERATION SEQUENCING IN A CHINESE POPULATION WITH VITELLIFORM MACULAR DYSTROPHY*. Retina, 2019. **39**(8): p. 1613-1622.
5. Matson, M.E., S.V. Ly, and J.L. Monarrez, *Novel Mutation in BEST1 Associated with Atypical Best Vitelliform Dystrophy*. Optom Vis Sci, 2015. **92**(8): p. e180-9.

6. Boon, C.J., et al., *Clinical and molecular genetic analysis of best vitelliform macular dystrophy*. *Retina*, 2009. **29**(6): p. 835-47.
7. Querques, G., et al., *The spectrum of subclinical Best vitelliform macular dystrophy in subjects with mutations in BEST1 gene*. *Invest Ophthalmol Vis Sci*, 2011. **52**(7): p. 4678-84.
8. Tian, R., et al., *Screening for BEST1 gene mutations in Chinese patients with bestrophinopathy*. *Mol Vis*, 2014. **20**: p. 1594-604.
9. Lacassagne, E., et al., *Phenotypic variability in a French family with a novel mutation in the BEST1 gene causing multifocal best vitelliform macular dystrophy*. *Mol Vis*, 2011. **17**: p. 309-22.
10. Apushkin, M.A., et al., *Novel de novo mutation in a patient with Best macular dystrophy*. *Arch Ophthalmol*, 2006. **124**(6): p. 887-9.
11. Birtel, J., et al., *Clinical and genetic characteristics of 251 consecutive patients with macular and cone/cone-rod dystrophy*. *Sci Rep*, 2018. **8**(1): p. 4824.
12. Bakall, B., et al., *The mutation spectrum of the bestrophin protein--functional implications*. *Hum Genet*, 1999. **104**(5): p. 383-9.
13. Boon, C.J., et al., *Clinical and genetic heterogeneity in multifocal vitelliform dystrophy*. *Arch Ophthalmol*, 2007. **125**(8): p. 1100-6.
14. Petrukhin, K., et al., *Identification of the gene responsible for Best macular dystrophy*. *Nat Genet*, 1998. **19**(3): p. 241-7.
15. White, K., A. Marquardt, and B.H. Weber, *VMD2 mutations in vitelliform macular dystrophy (Best disease) and other maculopathies*. *Hum Mutat*, 2000. **15**(4): p. 301-8.
16. Lotery, A.J., et al., *Allelic variation in the VMD2 gene in best disease and age-related macular degeneration*. *Invest Ophthalmol Vis Sci*, 2000. **41**(6): p. 1291-6.
17. Tian, L., et al., *Screening of BEST1 Gene in a Chinese Cohort With Best Vitelliform Macular Dystrophy or Autosomal Recessive Bestrophinopathy*. *Invest Ophthalmol Vis Sci*, 2017. **58**(9): p. 3366-3375.
18. Querques, G., et al., *Functional and clinical data of Best vitelliform macular dystrophy patients with mutations in the BEST1 gene*. *Mol Vis*, 2009. **15**: p. 2960-72.
19. Schatz, P., et al., *Evaluation of macular structure and function by OCT and electrophysiology in patients with vitelliform macular dystrophy due to mutations in BEST1*. *Invest Ophthalmol Vis Sci*, 2010. **51**(9): p. 4754-65.
20. Meunier, I., et al., *Systematic screening of BEST1 and PRPH2 in juvenile and adult vitelliform macular dystrophies: a rationale for molecular analysis*. *Ophthalmology*, 2011. **118**(6): p. 1130-6.
21. Cohn, A.C., et al., *Best's macular dystrophy in Australia: phenotypic profile and identification of novel BEST1 mutations*. *Eye (Lond)*, 2011. **25**(2): p. 208-17.
22. Krämer, F., et al., *Mutations in the VMD2 gene are associated with juvenile-onset vitelliform macular dystrophy (Best disease) and adult vitelliform macular dystrophy but not age-related macular degeneration*. *Eur J Hum Genet*, 2000. **8**(4): p. 286-92.

23. Alapati, A., et al., *Molecular diagnostic testing by eyeGENE: analysis of patients with hereditary retinal dystrophy phenotypes involving central vision loss*. Invest Ophthalmol Vis Sci, 2014. **55**(9): p. 5510-21.
24. Marquardt, A., et al., *Mutations in a novel gene, VMD2, encoding a protein of unknown properties cause juvenile-onset vitelliform macular dystrophy (Best's disease)*. Hum Mol Genet, 1998. **7**(9): p. 1517-25.
25. Krämer, F., et al., *Ten novel mutations in VMD2 associated with Best macular dystrophy (BMD)*. Hum Mutat, 2003. **22**(5): p. 418.
26. Luo, J., et al., *Novel BEST1 mutations and special clinical characteristics of autosomal recessive bestrophinopathy in Chinese patients*. Acta Ophthalmol, 2019. **97**(3): p. 247-259.
27. Zhong, Y., et al., *Flat Anterior Chamber after Trabeculectomy in Secondary Angle-Closure Glaucoma with BEST1 Gene Mutation: Case Series*. PLoS One, 2017. **12**(1): p. e0169395.
28. Caldwell, G.M., et al., *Bestrophin gene mutations in patients with Best vitelliform macular dystrophy*. Genomics, 1999. **58**(1): p. 98-101.
29. Gao, T., et al., *Clinical and Mutation Analysis of Patients with Best Vitelliform Macular Dystrophy or Autosomal Recessive Bestrophinopathy in Chinese Population*. Biomed Res Int, 2018. **2018**: p. 4582816.
30. Glavač, D., et al., *Clinical and genetic heterogeneity in Slovenian patients with BEST disease*. Acta Ophthalmol, 2016. **94**(8): p. e786-e794.
31. Arora, R., et al., *Unilateral BEST1-Associated Retinopathy*. Am J Ophthalmol, 2016. **169**: p. 24-32.
32. Liu, J., et al., *Novel BEST1 Mutations and Special Clinical Features of Best Vitelliform Macular Dystrophy*. Ophthalmic Res, 2016. **56**(4): p. 178-185.
33. Marchant, D., et al., *Identification of novel VMD2 gene mutations in patients with best vitelliform macular dystrophy*. Hum Mutat, 2001. **17**(3): p. 235.
34. Bitner, H., et al., *Frequency, genotype, and clinical spectrum of best vitelliform macular dystrophy: data from a national center in Denmark*. Am J Ophthalmol, 2012. **154**(2): p. 403-412.e4.
35. Boon, C.J., et al., *Autosomal recessive bestrophinopathy: differential diagnosis and treatment options*. Ophthalmology, 2013. **120**(4): p. 809-20.
36. Nakanishi, A., et al., *Clinical and Genetic Findings of Autosomal Recessive Bestrophinopathy in Japanese Cohort*. Am J Ophthalmol, 2016. **168**: p. 86-94.
37. Boon, C.J., et al., *The spectrum of ocular phenotypes caused by mutations in the BEST1 gene*. Prog Retin Eye Res, 2009. **28**(3): p. 187-205.
38. Sodi, A., et al., *BEST1 sequence variants in Italian patients with vitelliform macular dystrophy*. Mol Vis, 2012. **18**: p. 2736-48.
39. Downs, K., et al., *Molecular testing for hereditary retinal disease as part of clinical care*. Arch Ophthalmol, 2007. **125**(2): p. 252-8.
40. Kay, C.N., et al., *Three-dimensional distribution of the vitelliform lesion, photoreceptors, and retinal pigment epithelium in the macula of patients with best vitelliform macular dystrophy*. Arch Ophthalmol, 2012. **130**(3): p. 357-64.
41. Stone, E.M., et al., *Clinically Focused Molecular Investigation of 1000 Consecutive Families with Inherited Retinal Disease*. Ophthalmology, 2017. **124**(9): p. 1314-1331.

42. Davidson, A.E., et al., *A synonymous codon variant in two patients with autosomal recessive bestrophinopathy alters in vitro splicing of BEST1*. Mol Vis, 2010. **16**: p. 2916-22.
43. Jun, I., et al., *Adult-Onset Vitelliform Macular Dystrophy caused by BEST1 p.Ile38Ser Mutation is a Mild Form of Best Vitelliform Macular Dystrophy*. Sci Rep, 2017. **7**(1): p. 9146.
44. Lee, C.S., et al., *A Novel BEST1 Mutation in Autosomal Recessive Bestrophinopathy*. Invest Ophthalmol Vis Sci, 2015. **56**(13): p. 8141-50.
45. Burgess, R., et al., *Biallelic mutation of BEST1 causes a distinct retinopathy in humans*. Am J Hum Genet, 2008. **82**(1): p. 19-31.
46. Zhao, L., et al., *A novel compound heterozygous mutation in the BEST1 gene causes autosomal recessive Best vitelliform macular dystrophy*. Eye (Lond), 2012. **26**(6): p. 866-71.
47. Nguyen, T.T., et al., *Next generation sequencing identifies novel disease-associated BEST1 mutations in Bestrophinopathy patients*. Sci Rep, 2018. **8**(1): p. 10176.
48. Borman, A.D., et al., *Childhood-onset autosomal recessive bestrophinopathy*. Arch Ophthalmol, 2011. **129**(8): p. 1088-93.
49. Gerth, C., et al., *Detailed analysis of retinal function and morphology in a patient with autosomal recessive bestrophinopathy (ARB)*. Doc Ophthalmol, 2009. **118**(3): p. 239-46.
50. Eksandh, L., et al., *Best's vitelliform macular dystrophy caused by a new mutation (Val89Ala) in the VMD2 gene*. Ophthalmic Genet, 2001. **22**(2): p. 107-15.
51. Schatz, P., et al., *Retinal structure in young patients aged 10 years or less with Best vitelliform macular dystrophy*. Graefes Arch Clin Exp Ophthalmol, 2016. **254**(2): p. 215-21.
52. Frennesson, C.I., C. Wadelius, and S.E. Nilsson, *Best vitelliform macular dystrophy in a Swedish family: genetic analysis and a seven-year follow-up of photodynamic treatment of a young boy with choroidal neovascularization*. Acta Ophthalmol, 2014. **92**(3): p. 238-42.
53. MacDonald, I.M., et al., *Phenotype and genotype of patients with autosomal recessive bestrophinopathy*. Ophthalmic Genet, 2012. **33**(3): p. 123-9.
54. Pianta, M.J., et al., *In vivo micropathology of Best macular dystrophy with optical coherence tomography*. Exp Eye Res, 2003. **76**(2): p. 203-11.
55. Pasquay, C., et al., *Bestrophin 1--Phenotypes and Functional Aspects in Bestrophinopathies*. Ophthalmic Genet, 2015. **36**(3): p. 193-212.
56. Lin, Y., et al., *Bestrophin 1 gene analysis and associated clinical findings in a Chinese patient with Best vitelliform macular dystrophy*. Mol Med Rep, 2017. **16**(4): p. 4751-4755.
57. Wabbels, B., et al., *Genotype-phenotype correlation and longitudinal course in ten families with Best vitelliform macular dystrophy*. Graefes Arch Clin Exp Ophthalmol, 2006. **244**(11): p. 1453-66.
58. Avela, K., et al., *A founder mutation in CERKL is a major cause of retinal dystrophy in Finland*. Acta Ophthalmol, 2018. **96**(2): p. 183-191.



59. Sodi, A., et al., *Ocular phenotypes associated with biallelic mutations in BEST1 in Italian patients*. *Mol Vis*, 2011. **17**: p. 3078-87.
60. Piñeiro-Gallego, T., et al., *Clinical evaluation of two consanguineous families with homozygous mutations in BEST1*. *Mol Vis*, 2011. **17**: p. 1607-17.
61. Kay, D.B., et al., *Outer retinal structure in best vitelliform macular dystrophy*. *JAMA Ophthalmol*, 2013. **131**(9): p. 1207-15.
62. Hussain, R.N., et al., *Use of Intravitreal Bevacizumab in a 9-Year-Old Child with Choroidal Neovascularization Associated with Autosomal Recessive Bestrophinopathy*. *Ophthalmic Genet*, 2015. **36**(3): p. 265-9.
63. Marchant, D., et al., *New VMD2 gene mutations identified in patients affected by Best vitelliform macular dystrophy*. *J Med Genet*, 2007. **44**(3): p. e70.
64. Davidson, A.E., et al., *Missense mutations in a retinal pigment epithelium protein, bestrophin-1, cause retinitis pigmentosa*. *Am J Hum Genet*, 2009. **85**(5): p. 581-92.
65. Wivestad Jansson, R., et al., *Biallelic Mutations in the BEST1 Gene: Additional Families with Autosomal Recessive Bestrophinopathy*. *Ophthalmic Genet*, 2016. **37**(2): p. 183-93.
66. Johnson, A.A., et al., *Autosomal Recessive Bestrophinopathy Is Not Associated With the Loss of Bestrophin-1 Anion Channel Function in a Patient With a Novel BEST1 Mutation*. *Invest Ophthalmol Vis Sci*, 2015. **56**(8): p. 4619-30.
67. Iannaccone, A., et al., *Autosomal recessive best vitelliform macular dystrophy: report of a family and management of early-onset neovascular complications*. *Arch Ophthalmol*, 2011. **129**(2): p. 211-7.
68. Madhusudhan, S., A. Hussain, and J.N. Sahni, *Value of anti-VEGF treatment in choroidal neovascularization associated with autosomal recessive bestrophinopathy*. *Digit J Ophthalmol*, 2013. **19**(4): p. 59-63.
69. Allikmets, R., et al., *Evaluation of the Best disease gene in patients with age-related macular degeneration and other maculopathies*. *Hum Genet*, 1999. **104**(6): p. 449-53.
70. Huang, X., et al., *Mutation analysis of the genes associated with anterior segment dysgenesis, microcornea and microphthalmia in 257 patients with glaucoma*. *Int J Mol Med*, 2015. **36**(4): p. 1111-7.
71. Wang, Y.T., et al., *RECURRENCE OF VITELLIFORM LESIONS ASSOCIATED WITH TEMPORARY VISION LOSS IN BEST VITELLIFORM MACULAR DYSTROPHY*. *Retin Cases Brief Rep*, 2016. **10**(1): p. 63-71.
72. Pomares, E., et al., *Nonsense-mediated decay as the molecular cause for autosomal recessive bestrophinopathy in two unrelated families*. *Invest Ophthalmol Vis Sci*, 2012. **53**(1): p. 532-7.
73. Guerriero, S., et al., *Autosomal recessive bestrophinopathy: new observations on the retinal phenotype - clinical and molecular report of an Italian family*. *Ophthalmologica*, 2011. **225**(4): p. 228-35.
74. Davidson, A.E., et al., *Functional characterization of bestrophin-1 missense mutations associated with autosomal recessive bestrophinopathy*. *Invest Ophthalmol Vis Sci*, 2011. **52**(6): p. 3730-6.

75. Toto, L., et al., *BESTROPHINOPATHY: A Spectrum of Ocular Abnormalities Caused by the c.614T>C Mutation in the BEST1 Gene*. *Retina*, 2016. **36**(8): p. 1586-95.
76. Silva, R.A., et al., *Novel mutation in BEST1 associated with retinoschisis*. *JAMA Ophthalmol*, 2013. **131**(6): p. 794-8.
77. Atchaneeyasakul, L.O., et al., *Mutation analysis of the VMD2 gene in thai families with best macular dystrophy*. *Ophthalmic Genet*, 2008. **29**(3): p. 139-44.
78. Hardin, J.S., et al., *A unique case series of autosomal recessive bestrophinopathy exhibiting multigenerational inheritance*. *Ophthalmic Genet*, 2017. **38**(6): p. 570-574.
79. Introini, U., et al., *Clinical Course of Autosomal Recessive Bestrophinopathy Complicated by Choroidal Neovascularization*. *Ophthalmic Surg Lasers Imaging Retina*, 2018. **49**(11): p. 888-892.
