# Supplementary material for: Phenotypic and Genetic Spectrum of Autosomal Recessive Bestrophinopathy and Best Vitelliform Macular Dystrophy
Source: PubMed Central journal article supplement — Invest Ophthalmol Vis Sci. 2021 May 20;62(6):22. doi: 10.1167/iovs.62.6.22 (PMC8142704; doi:10.1167/iovs.62.6.22), 2021-05-20
Supplement: iovs-62-6-22_s002.pdf [file iovs-62-6-22_s002.pdf]

| Mutation  | Inheritance | Phenotype   | Reference                |
|-----------|-------------|-------------|--------------------------|
| Cys221Phe | AD          | VMD         | [1, 2]                   |
| Cys221Trp | AD          | VMD         | [1, 3]                   |
| Gly222Glu | AD          | VMD         | [1, 4, 5]                |
| Gly222Val | AR          | ARB         | [6]                      |
| Gly222Val | AD          | VMD         | [7, 8]                   |
| Leu224Met | AD          | VMD         | [1, 9, 10]               |
| Leu224Pro | AD          | VMD         | [1, 7, 11]               |
| Leu224Gln | AR          | ARB         | This study               |
| Tyr227Cys | AD          | VMD         | [6, 7, 10, 12-14]        |
| Tyr227Phe | AD          | VMD         | [1, 15]                  |
| Tyr227Asn | AD          | VMD         | [1, 6, 7, 10, 13, 16-19] |
| Asp228Glu | AR          | ARB         | [6]                      |
| Asp228Glu | AD          | VMD         | [6, 11]                  |
| Trp229Gly | AD          | VMD         | [20]                     |
| Ile230Asn | AD          | VMD         | [1]                      |
| Ile230Thr | AD          | VMD         | [21]                     |
| Ser231Arg | AD          | VMD         | [1, 9, 10] Check kinnick |
| Ser231Thr | AD          | VMD         | [1, 5, 22]               |
| Ile232Asn | AD          | VMD         | [1, 15]                  |
| Pro233Ala | AR          | VMD         | [23]                     |
| Pro233Leu | AD          | VMD         | [1, 24]                  |
| Pro233Gln | AD          | VMD         | [1, 25]                  |
| Ala234Val | AD          | VMD         | [26]                     |
| Val235Leu | AD          | VMD         | [1, 25]                  |
| Val235Met | AD          | VMD         | [1, 10, 13]              |
| Thr237Arg | AD          | VMD         | [1, 9, 10, 15]           |
| Thr237Ser | AD          | VMD         | [1, 15]                  |
| Gln238Leu | AR          | ARB         | [27]                     |
| Val239X   | AR          | ARB         | [28]                     |
| Thr241Asn | AD          | VMD         | [1, 6, 19, 29]           |
| Val242Met | AD          | VMD         | [1, 4, 30]               |
| Ala243Glu | AR          | ARB         | [31]                     |
| Ala243Thr | AD          | VMD         | [1, 7, 12]               |
| Ala243Val | AD          | VMD         | [1, 6, 9-11, 18, 21, 29] |
| Cys251Tyr | AR          | ARB         | [32]                     |
| Arg255Gln | AR          | ARB         | [33, 34]                 |
| Arg255Trp | AR          | VMD and ARB | [8, 28, 33-37]           |
| Arg255Trp | AD          | VMD         | [1, 24, 38]              |
| Arg255Arg | AR          | ARB         | [36]                     |
| Arg255X   | AR          | ARB         | [39]                     |

|           |           |             |                                                                                                           |
|-----------|-----------|-------------|-----------------------------------------------------------------------------------------------------------|
| Asn259X   | AR        | VMD and ARB | [6]                                                                                                       |
| Pro260X   | AR        | ARB         | [40]                                                                                                      |
| Pro260X   | AD        | VMD         | [29]                                                                                                      |
| Val273Met | AR        | ARB         | [34]                                                                                                      |
| Val273del | AR        | ARB         | This study                                                                                                |
| Pro274Arg | AR        | VMD and ARB | [1]                                                                                                       |
| Val275Ile | AR        | VMD         | [1]                                                                                                       |
| Phe276Leu | AD        | VMD         | [1, 7]                                                                                                    |
| Thr277Met | AR        | ARB         | [33, 34, 36, 41],<br>This study                                                                           |
| Phe281Ser | AR        | ARB         | [33], Luo <i>et al.</i><br>Novel Best1<br>Mutations in<br>chinese patients.<br><i>Arvo Abstract. 2017</i> |
| Phe281X   | AD and AR | VMD         | [1, 7]                                                                                                    |
| Phe283X   | AR        | ARB         | [31]                                                                                                      |
| Tyr284Cys | AD        | VMD         | [1, 2]                                                                                                    |
| Trp287X   | AD and AR | VMD         | [1, 37, 42]                                                                                               |
| Trp287X   | AR        | ARB         | [36, 43]                                                                                                  |
| Ala291Val | AD        | VMD         | [37]                                                                                                      |
| Glu292Lys | AD        | VMD         | [1, 22, 44, 45]                                                                                           |
| Gln293His | AD        | VMD         | [1, 5, 37]                                                                                                |
| Gln293Lys | AD        | VMD         | [1, 10, 16]                                                                                               |
| Gln293X   | AR        | ARB         | [46]                                                                                                      |
| Leu294Phe | AD        | VMD         | [12]                                                                                                      |
| Leu294Phe | AR        | ARB         | [40]                                                                                                      |
| Leu294Val | AD        | VMD         | [1, 5, 29, 47]                                                                                            |
| Leu294X   | AD        | VMD         | [1, 6, 19]                                                                                                |
| Ile295Thr | AD        | VMD         | [29, 47, 48]                                                                                              |
| Ile295Val | AD        | VMD         | [1, 2]                                                                                                    |
| Ile295Leu | AR        | ARB         | [6]                                                                                                       |
| Ile295X   | AD        | VMD         | [9, 10, 13, 15, 26,<br>29, 49]                                                                            |
| Asn296Asp | AD        | VMD         | [1, 42]                                                                                                   |
| Asn296His | AD        | VMD         | [1, 7]                                                                                                    |
| Asn296Lys | AD        | VMD         | [1, 50]                                                                                                   |
| Asn296Ser | AD        | VMD         | [1, 2, 12, 25, 51]                                                                                        |
| Asn296Ser | AR        | ARB         | [36]                                                                                                      |
| Pro297Ala | AD        | VMD         | [1, 7, 10, 13]                                                                                            |
| Pro297Ser | AD        | VMD         | [1, 10, 52, 53]                                                                                           |
| Pro297Thr | AD        | VMD         | [1, 38]                                                                                                   |
| Phe298Cys | AD        | VMD         | [47]                                                                                                      |
| Phe298Ser | AD        | VMD         | [1, 26, 29, 50]                                                                                           |

|           |                       |     |                              |
|-----------|-----------------------|-----|------------------------------|
| Phe298Val | AD                    | VMD | [22]                         |
| Gly299Glu | AD                    | VMD | [1, 10, 16, 17]              |
| Gly299Ala | AD                    | VMD | [1, 18]                      |
| Gly299Arg | AD                    | VMD | [1, 5]                       |
| Glu300Asp | AD                    | VMD | [1, 6, 7, 10, 52-54]         |
| Glu300Lys | AD                    | VMD | [1, 6, 7, 9, 10, 19, 44, 48] |
| Asp301Glu | AD                    | VMD | [1, 8-12, 29, 54, 55]        |
| Asp301Gly | AD                    | VMD | [1, 37, 38]                  |
| Asp301Asn | AD                    | VMD | [9, 10]                      |
| Asp301X   | AD                    | VMD | [1, 7, 19]                   |
| Asp302Ala | AD                    | VMD | [1, 6, 19, 47, 51]           |
| Asp302Gly | AD                    | VMD | [1, 7]                       |
| Asp302His | AD                    | VMD | [1, 56]                      |
| Asp302Asn | AD                    | VMD | [51, 57]                     |
| Asp302Val | AD                    | VMD | [1, 7]                       |
| Asp302X   | AD                    | VMD | [18, 50]                     |
| Asp303Glu | AD                    | VMD | [1, 56]                      |
| Asp303Gly | Semi-dominant         | ARB | [35]                         |
| Asp303Gly | AD                    | VMD | [1]                          |
| Asp303Asn | AD                    | VMD | [26]                         |
| Asp304Gly | AD                    | VMD | [1, 26]                      |
| Asp304Asn | AD                    | VMD | [1, 12]                      |
| Asp304Val | AD                    | VMD | [58]                         |
| Asp304X   | AD                    | VMD | [4, 20, 24]                  |
| Phe305Ser | AD                    | VMD | [1, 10, 13]                  |
| Phe305Tyr | AD                    | VMD | [1]                          |
| Glu306Asp | AD                    | VMD | [1, 4]                       |
| Glu306Gly | AD                    | VMD | [1, 5, 7]                    |
| Glu306Asn | AD                    | VMD | [7]                          |
| Thr307Ala | AD                    | VMD | [1, 7]                       |
| Thr307Ile | AD                    | VMD | [1, 7, 10, 19, 54, 59]       |
| Thr307Asn | AD                    | VMD | [44, 48]                     |
| Asn308Ser | AD                    | VMD | [1, 56]                      |
| Trp309Arg | AD                    | VMD | [1, 12]                      |
| Ile310Thr | AD                    | VMD | [1, 2, 9, 10, 12]            |
| Val311Gly | AD                    | VMD | [1, 9, 10]                   |
| Asp312Glu | AD, AR, Semi-dominant | VMD | [1, 57, 60, 61]              |
| Asp312Asn | AR                    | ARB | [11, 26, 39, 62]             |
| Asp312Asn | AD and AR             | VMD | [1, 11]                      |
| Gln316His | AR                    | VMD | [1]                          |
| Gln316Pro | AD                    | VMD | [1, 19]                      |

|           |           |             |                  |
|-----------|-----------|-------------|------------------|
| Val317Met | AR        | VMD and ARB | [1, 36, 62]      |
| Ser318X   | AR        | ARB         | [34]             |
| Leu319Pro | AR        | ARB         | [11]             |
| Met325Thr | AR        | ARB         | [62-64]          |
| Gln327X   | AR        | ARB         | [65]             |
| Pro346His | AD        | VMD         | [4]              |
| Tyr347X   | AR        | ARB         | [66]             |
| Arg355His | AR        | ARB         | [36]             |
| Arg356X   | AR        | ARB         | [33, 34, 66, 67] |
| Ala357Val | AR        | ARB         | [33]             |
| Ile366X   | AR        | VMD and ARB | [1, 68]          |
| Met373X   | AD and AR | VMD         | [1, 6]           |
| Glu374X   | AR        | ARB         | [40]             |
| Glu374X   | AD        | VMD         | [49]             |
| Leu472X   | AR        | VMD         | [69]             |
| His490X   | AD and AR | VMD         | [1]              |
| His490X   | AR        | ARB         | [70]             |
| Val492Ile | AD        | VMD         | [1]              |
| Ser517X   | AR        | ARB         | [33]             |
| Thr536Thr | AD        | VMD         | [55]             |
| Glu557Lys | AD        | VMD         | [1]              |
| Glu557X   | AR        | VMD         | [71]             |

**Supplemental Table 2.** List of ARB and VMD mutations and accompanying inheritance patterns for BEST1 residues 221-585.

1. Kinnick, T.R., et al., *Autosomal recessive vitelliform macular dystrophy in a large cohort of vitelliform macular dystrophy patients*. *Retina*, 2011. **31**(3): p. 581-95.
2. Cohn, A.C., et al., *Best's macular dystrophy in Australia: phenotypic profile and identification of novel BEST1 mutations*. *Eye (Lond)*, 2011. **25**(2): p. 208-17.
3. Palomba, G., et al., *A novel spontaneous missense mutation in VMD2 gene is a cause of a best macular dystrophy sporadic case*. *Am J Ophthalmol*, 2000. **129**(2): p. 260-2.
4. Katagiri, S., et al., *Mutation analysis of BEST1 in Japanese patients with Best's vitelliform macular dystrophy*. *Br J Ophthalmol*, 2015. **99**(11): p. 1577-82.
5. Marchant, D., et al., *New VMD2 gene mutations identified in patients affected by Best vitelliform macular dystrophy*. *J Med Genet*, 2007. **44**(3): p. e70.
6. Stone, E.M., et al., *Clinically Focused Molecular Investigation of 1000 Consecutive Families with Inherited Retinal Disease*. *Ophthalmology*, 2017. **124**(9): p. 1314-1331.
7. Lotery, A.J., et al., *Allelic variation in the VMD2 gene in best disease and age-related macular degeneration*. *Invest Ophthalmol Vis Sci*, 2000. **41**(6): p. 1291-6.

8. Gao, T., et al., *Clinical and Mutation Analysis of Patients with Best Vitelliform Macular Dystrophy or Autosomal Recessive Bestrophinopathy in Chinese Population*. Biomed Res Int, 2018. **2018**: p. 4582816.
9. Krämer, F., et al., *Mutations in the VMD2 gene are associated with juvenile-onset vitelliform macular dystrophy (Best disease) and adult vitelliform macular dystrophy but not age-related macular degeneration*. Eur J Hum Genet, 2000. **8**(4): p. 286-92.
10. White, K., A. Marquardt, and B.H. Weber, *VMD2 mutations in vitelliform macular dystrophy (Best disease) and other maculopathies*. Hum Mutat, 2000. **15**(4): p. 301-8.
11. Birtel, J., et al., *Clinical and genetic characteristics of 251 consecutive patients with macular and cone/cone-rod dystrophy*. Sci Rep, 2018. **8**(1): p. 4824.
12. Alapati, A., et al., *Molecular diagnostic testing by eyeGENE: analysis of patients with hereditary retinal dystrophy phenotypes involving central vision loss*. Invest Ophthalmol Vis Sci, 2014. **55**(9): p. 5510-21.
13. Marquardt, A., et al., *Mutations in a novel gene, VMD2, encoding a protein of unknown properties cause juvenile-onset vitelliform macular dystrophy (Best's disease)*. Hum Mol Genet, 1998. **7**(9): p. 1517-25.
14. Schönbach, E.M. and H.P. Scholl, *FUNDUS AUTOFLUORESCENCE IN A SUBCLINICAL CASE OF BEST DISEASE*. Retin Cases Brief Rep, 2017. **11 Suppl 1**: p. S159-S162.
15. Wabbels, B., et al., *Genotype-phenotype correlation and longitudinal course in ten families with Best vitelliform macular dystrophy*. Graefes Arch Clin Exp Ophthalmol, 2006. **244**(11): p. 1453-66.
16. Bakall, B., et al., *The mutation spectrum of the bestrophin protein--functional implications*. Hum Genet, 1999. **104**(5): p. 383-9.
17. Petrukhin, K., et al., *Identification of the gene responsible for Best macular dystrophy*. Nat Genet, 1998. **19**(3): p. 241-7.
18. Boon, C.J., et al., *Clinical and molecular genetic analysis of best vitelliform macular dystrophy*. Retina, 2009. **29**(6): p. 835-47.
19. Kay, C.N., et al., *Three-dimensional distribution of the vitelliform lesion, photoreceptors, and retinal pigment epithelium in the macula of patients with best vitelliform macular dystrophy*. Arch Ophthalmol, 2012. **130**(3): p. 357-64.
20. Lin, Y., et al., *Two novel mutations in the bestrophin-1 gene and associated clinical observations in patients with best vitelliform macular dystrophy*. Mol Med Rep, 2015. **12**(2): p. 2584-8.
21. Querques, G., et al., *Functional and clinical data of Best vitelliform macular dystrophy patients with mutations in the BEST1 gene*. Mol Vis, 2009. **15**: p. 2960-72.
22. Arora, R., et al., *Unilateral BEST1-Associated Retinopathy*. Am J Ophthalmol, 2016. **169**: p. 24-32.
23. Wittström, E., et al., *Morphological and functional changes in multifocal vitelliform retinopathy and biallelic mutations in BEST1*. Ophthalmic Genet, 2011. **32**(2): p. 83-96.

24. Huang, X., et al., *Mutation analysis of the genes associated with anterior segment dysgenesis, microcornea and microphthalmia in 257 patients with glaucoma*. *Int J Mol Med*, 2015. **36**(4): p. 1111-7.
25. Marchant, D., et al., *Identification of novel VMD2 gene mutations in patients with best vitelliform macular dystrophy*. *Hum Mutat*, 2001. **17**(3): p. 235.
26. Sodi, A., et al., *BEST1 sequence variants in Italian patients with vitelliform macular dystrophy*. *Mol Vis*, 2012. **18**: p. 2736-48.
27. Sharon, D., et al., *Ocular phenotype analysis of a family with biallelic mutations in the BEST1 gene*. *Am J Ophthalmol*, 2014. **157**(3): p. 697-709.e1-2.
28. Kubota, D., et al., *Detailed analysis of family with autosomal recessive bestrophinopathy associated with new BEST1 mutation*. *Doc Ophthalmol*, 2016. **132**(3): p. 233-43.
29. Krämer, F., et al., *Ten novel mutations in VMD2 associated with Best macular dystrophy (BMD)*. *Hum Mutat*, 2003. **22**(5): p. 418.
30. Atchaneeyasakul, L.O., et al., *Mutation analysis of the VMD2 gene in thai families with best macular dystrophy*. *Ophthalmic Genet*, 2008. **29**(3): p. 139-44.
31. Fung, A.T., et al., *New best1 mutations in autosomal recessive bestrophinopathy*. *Retina*, 2015. **35**(4): p. 773-82.
32. Sheng, X., et al., *A novel homozygous BEST1 mutation correlates with complex ocular phenotypes*. *Ophthalmology*, 2013. **120**(7): p. 1511-2.e2.
33. Zhong, Y., et al., *Flat Anterior Chamber after Trabeculectomy in Secondary Angle-Closure Glaucoma with BEST1 Gene Mutation: Case Series*. *PLoS One*, 2017. **12**(1): p. e0169395.
34. Luo, J., et al., *Novel BEST1 mutations and special clinical characteristics of autosomal recessive bestrophinopathy in Chinese patients*. *Acta Ophthalmol*, 2019. **97**(3): p. 247-259.
35. Nakanishi, A., et al., *Clinical and Genetic Findings of Autosomal Recessive Bestrophinopathy in Japanese Cohort*. *Am J Ophthalmol*, 2016. **168**: p. 86-94.
36. Tian, L., et al., *Screening of BEST1 Gene in a Chinese Cohort With Best Vitelliform Macular Dystrophy or Autosomal Recessive Bestrophinopathy*. *Invest Ophthalmol Vis Sci*, 2017. **58**(9): p. 3366-3375.
37. Tian, R., et al., *Screening for BEST1 gene mutations in Chinese patients with bestrophinopathy*. *Mol Vis*, 2014. **20**: p. 1594-604.
38. Wong, R.L., et al., *Novel and homozygous BEST1 mutations in Chinese patients with Best vitelliform macular dystrophy*. *Retina*, 2010. **30**(5): p. 820-7.
39. Boon, C.J., et al., *Autosomal recessive bestrophinopathy: differential diagnosis and treatment options*. *Ophthalmology*, 2013. **120**(4): p. 809-20.
40. Preising, M.N., et al., *[Autosomal recessive bestrophinopathy (ARB): a clinical and molecular description of two patients at childhood]*. *Klin Monbl Augenheilkd*, 2012. **229**(10): p. 1009-17.
41. Zaneveld, J., et al., *Comprehensive analysis of patients with Stargardt macular dystrophy reveals new genotype-phenotype correlations and unexpected diagnostic revisions*. *Genet Med*, 2015. **17**(4): p. 262-70.
42. Downs, K., et al., *Molecular testing for hereditary retinal disease as part of clinical care*. *Arch Ophthalmol*, 2007. **125**(2): p. 252-8.

43. MacDonald, I.M., et al., *Phenotype and genotype of patients with autosomal recessive bestrophinopathy*. Ophthalmic Genet, 2012. **33**(3): p. 123-9.
44. Liu, J., et al., *Novel BEST1 Mutations and Special Clinical Features of Best Vitelliform Macular Dystrophy*. Ophthalmic Res, 2016. **56**(4): p. 178-185.
45. Sohn, E.H., et al., *Phenotypic variability due to a novel Glu292Lys variation in exon 8 of the BEST1 gene causing best macular dystrophy*. Arch Ophthalmol, 2009. **127**(7): p. 913-20.
46. Madhusudhan, S., A. Hussain, and J.N. Sahni, *Value of anti-VEGF treatment in choroidal neovascularization associated with autosomal recessive bestrophinopathy*. Digit J Ophthalmol, 2013. **19**(4): p. 59-63.
47. Meunier, I., et al., *Systematic screening of BEST1 and PRPH2 in juvenile and adult vitelliform macular dystrophies: a rationale for molecular analysis*. Ophthalmology, 2011. **118**(6): p. 1130-6.
48. Guo, J., et al., *NOVEL BEST1 MUTATIONS DETECTED BY NEXT-GENERATION SEQUENCING IN A CHINESE POPULATION WITH VITELLIFORM MACULAR DYSTROPHY*. Retina, 2019. **39**(8): p. 1613-1622.
49. Pasquay, C., et al., *Bestrophin 1--Phenotypes and Functional Aspects in Bestrophinopathies*. Ophthalmic Genet, 2015. **36**(3): p. 193-212.
50. Boon, C.J., et al., *Clinical and genetic heterogeneity in multifocal vitelliform dystrophy*. Arch Ophthalmol, 2007. **125**(8): p. 1100-6.
51. Bitner, H., et al., *Frequency, genotype, and clinical spectrum of best vitelliform macular dystrophy: data from a national center in Denmark*. Am J Ophthalmol, 2012. **154**(2): p. 403-412.e4.
52. Allikmets, R., et al., *Evaluation of the Best disease gene in patients with age-related macular degeneration and other maculopathies*. Hum Genet, 1999. **104**(6): p. 449-53.
53. Seddon, J.M., et al., *Phenotype and genotype correlations in two best families*. Ophthalmology, 2003. **110**(9): p. 1724-31.
54. Caldwell, G.M., et al., *Bestrophin gene mutations in patients with Best vitelliform macular dystrophy*. Genomics, 1999. **58**(1): p. 98-101.
55. Lin, Y., et al., *Genetic variations in Bestrophin-1 and associated clinical findings in two Chinese patients with juvenile-onset and adult-onset best vitelliform macular dystrophy*. Mol Med Rep, 2018. **17**(1): p. 225-233.
56. Marchant, D., et al., *Use of denaturing HPLC and automated sequencing to screen the VMD2 gene for mutations associated with Best's vitelliform macular dystrophy*. Ophthalmic Genet, 2002. **23**(3): p. 167-74.
57. Schatz, P., et al., *Retinal structure in young patients aged 10 years or less with Best vitelliform macular dystrophy*. Graefes Arch Clin Exp Ophthalmol, 2016. **254**(2): p. 215-21.
58. Peiretti, E., et al., *A NOVEL P.ASP304GLY MUTATION IN BEST1 GENE ASSOCIATED WITH ATYPICAL BEST VITELLIFORM MACULAR DYSTROPHY PHENOTYPE AND HIGH INTRAFAMILIAL VARIABILITY*. Retina, 2016. **36**(9): p. 1733-40.
59. Pianta, M.J., et al., *In vivo micropathology of Best macular dystrophy with optical coherence tomography*. Exp Eye Res, 2003. **76**(2): p. 203-11.

60. Piñeiro-Gallego, T., et al., *Clinical evaluation of two consanguineous families with homozygous mutations in BEST1*. *Mol Vis*, 2011. **17**: p. 1607-17.
61. Schatz, P., et al., *Evaluation of macular structure and function by OCT and electrophysiology in patients with vitelliform macular dystrophy due to mutations in BEST1*. *Invest Ophthalmol Vis Sci*, 2010. **51**(9): p. 4754-65.
62. Burgess, R., et al., *Biallelic mutation of BEST1 causes a distinct retinopathy in humans*. *Am J Hum Genet*, 2008. **82**(1): p. 19-31.
63. Wivestad Jansson, R., et al., *Biallelic Mutations in the BEST1 Gene: Additional Families with Autosomal Recessive Bestrophinopathy*. *Ophthalmic Genet*, 2016. **37**(2): p. 183-93.
64. Boon, C.J., et al., *The spectrum of ocular phenotypes caused by mutations in the BEST1 gene*. *Prog Retin Eye Res*, 2009. **28**(3): p. 187-205.
65. Riera, M., et al., *Whole exome sequencing using Ion Proton system enables reliable genetic diagnosis of inherited retinal dystrophies*. *Sci Rep*, 2017. **7**: p. 42078.
66. Borman, A.D., et al., *Childhood-onset autosomal recessive bestrophinopathy*. *Arch Ophthalmol*, 2011. **129**(8): p. 1088-93.
67. Introini, U., et al., *Clinical Course of Autosomal Recessive Bestrophinopathy Complicated by Choroidal Neovascularization*. *Ophthalmic Surg Lasers Imaging Retina*, 2018. **49**(11): p. 888-892.
68. Johnson, A.A., et al., *Autosomal Recessive Bestrophinopathy Is Not Associated With the Loss of Bestrophin-1 Anion Channel Function in a Patient With a Novel BEST1 Mutation*. *Invest Ophthalmol Vis Sci*, 2015. **56**(8): p. 4619-30.
69. Bitner, H., et al., *A homozygous frameshift mutation in BEST1 causes the classical form of Best disease in an autosomal recessive mode*. *Invest Ophthalmol Vis Sci*, 2011. **52**(8): p. 5332-8.
70. Davidson, A.E., et al., *A synonymous codon variant in two patients with autosomal recessive bestrophinopathy alters in vitro splicing of BEST1*. *Mol Vis*, 2010. **16**: p. 2916-22.
71. Sodi, A., et al., *Ocular phenotypes associated with biallelic mutations in BEST1 in Italian patients*. *Mol Vis*, 2011. **17**: p. 3078-87.
